# Supplementary material for: Use of semaglutide and risk of non-arteritic anterior ischemic optic neuropathy: A Danish–Norwegian cohort study
Source: bioRxiv or medRxiv preprint supplement (doi:10.1101/2024.12.09.24318574), 2024-12-11

# Use of semaglutide and risk of non-arteritic anterior ischemic optic neuropathy: A Danish–Norwegian cohort study

## SUPPLEMENTARY MATERIAL

Emma Simonsen<sup>1</sup> MD  
Lars Christian Lund<sup>1</sup> MD PhD  
Martin Thomsen Ernst<sup>1</sup> MSc  
Vidar Hjellvik<sup>2</sup> PhD  
Laszlo Hegedüs<sup>3,4</sup> MD DMSc  
Steffen Hamann<sup>5,6</sup> MD PhD  
Øystein Kalsnes Jørstad<sup>7</sup> MD PhD  
Hanne Løvdal Gulseth<sup>2</sup> MD PhD  
Øystein Karlstad<sup>2</sup> MSc PhD  
Anton Pottegård<sup>1</sup> MSc PhD DMSc

- (1) Clinical Pharmacology, Pharmacy, and Environmental Medicine, Department of Public health, University of Southern Denmark, Odense, Denmark
- (2) Department of Chronic Diseases, Norwegian Institute of Public Health, Oslo, Norway
- (3) Department of Endocrinology, Odense University Hospital, Odense, Denmark
- (4) Department of Regional Health Research, University of Southern Denmark, Odense, Denmark
- (5) Department of Ophthalmology, Copenhagen University Hospital - Rigshospitalet, Copenhagen, Denmark
- (6) Department of Clinical Medicine, University of Copenhagen, Copenhagen, Denmark
- (7) Department of Ophthalmology, Oslo University Hospital, Oslo, Norway and Faculty of Medicine, University of Oslo, Oslo, Norway

### Correspondence

Anton Pottegård  
Professor  
Clinical Pharmacology, Pharmacy  
and Environmental Medicine  
University of Southern Denmark  
Campusvej 55  
DK-5230 Odense M, Denmark  
E-mail: [apottegaard@health.sdu.dk](mailto:apottegaard@health.sdu.dk)  
Phone: 0045 28913340  
ORCID: 0000-0001-9314-5679

**Table S1** Baseline characteristics for new users of semaglutide and sodium-glucose co-transporter 2 inhibitors in Denmark before and after standardized mortality ratio weighting

|                                | Unweighted cohort               |                              | SMD   | SMR-weighted population         |                              | SMD   |
|--------------------------------|---------------------------------|------------------------------|-------|---------------------------------|------------------------------|-------|
|                                | Semaglutide<br><i>n</i> = 44517 | SGLT-2is<br><i>n</i> = 84814 |       | Semaglutide<br><i>n</i> = 44027 | SGLT-2is<br><i>n</i> = 44076 |       |
| Male sex                       | 24283 (55)                      | 53943 (64)                   | 0.18  | 24012 (55)                      | 24079 (55)                   | <0.01 |
| Age, years                     |                                 |                              | 0.39  |                                 |                              | 0.05  |
| <50                            | 9139 (21)                       | 9271 (11)                    |       | 9045 (21)                       | 9648 (22)                    |       |
| 50-64                          | 18135 (41)                      | 28909 (34)                   |       | 17930 (41)                      | 17411 (40)                   |       |
| 65-79                          | 14780 (33)                      | 36152 (43)                   |       | 14619 (33)                      | 14232 (32)                   |       |
| 80+                            | 2463 (5.5)                      | 10482 (12)                   |       | 2434 (5.5)                      | 2785 (6.3)                   |       |
| <b>Diagnoses</b>               |                                 |                              |       |                                 |                              |       |
| Cerebrovascular disease        | 2499 (5.6)                      | 6170 (7.3)                   | 0.07  | 2470 (5.6)                      | 2518 (5.7)                   | <0.01 |
| Heart failure                  | 1781 (4.0)                      | 8440 (10)                    | 0.24  | 1759 (4.0)                      | 1787 (4.1)                   | <0.01 |
| Obesity                        | 9375 (21)                       | 8743 (10)                    | 0.30  | 9274 (21)                       | 9513 (22)                    | 0.01  |
| Ischemic heart disease         | 5403 (12)                       | 15169 (18)                   | 0.16  | 5337 (12)                       | 5394 (12)                    | <0.01 |
| Neurological complications     | 1928 (4.3)                      | 3603 (4.3)                   | <0.01 | 1909 (4.3)                      | 1957 (4.4)                   | 0.01  |
| Peripheral vascular disease    | 2242 (5.0)                      | 5218 (6.2)                   | 0.05  | 2219 (5.0)                      | 2277 (5.2)                   | 0.01  |
| Markers of alcohol abuse       | 1448 (3.3)                      | 2754 (3.3)                   | <0.01 | 1434 (3.3)                      | 1454 (3.3)                   | <0.01 |
| Markers of smoking             | 1524 (3.4)                      | 2644 (3.1)                   | 0.02  | 1507 (3.4)                      | 1533 (3.5)                   | <0.01 |
| Renal complications            | 7274 (16)                       | 18169 (21)                   | 0.13  | 71912 (16)                      | 7390 (17)                    | 0.01  |
| Eye complications              | 2526 (5.7)                      | 4648 (5.5)                   | 0.01  | 2494 (5.7)                      | 2574 (5.8)                   | 0.01  |
| <b>Medications</b>             |                                 |                              |       |                                 |                              |       |
| Statins                        | 28913 (65)                      | 61482 (72)                   | 0.16  | 28589 (65)                      | 28791 (65)                   | 0.01  |
| Anticoagulants                 | 4436 (10)                       | 12337 (15)                   | 0.14  | 4388 (10)                       | 4389 (10)                    | <0.01 |
| Antiplatelets                  | 10332 (23)                      | 25778 (30)                   | 0.16  | 10204 (23)                      | 10285 (23)                   | <0.01 |
| ACEi/ARB                       | 27201 (61)                      | 56125 (66)                   | 0.11  | 26916 (61)                      | 27020 (61)                   | <0.01 |
| Amiodaron                      | 207 (0.46)                      | 744 (0.88)                   | 0.05  | 204 (0.46)                      | 205 (0.47)                   | <0.01 |
| Phosphodiesterase-5 inhibitors | 2989 (6.7)                      | 6106 (7.2)                   | 0.02  | 2951 (6.7)                      | 2929 (6.7)                   | <0.01 |
| <b>Prescriber type</b>         |                                 |                              | 0.14  |                                 |                              | 0.03  |
| GP                             | 38548 (87)                      | 70860 (84)                   |       | 38135 (87)                      | 38409 (87)                   |       |
| Hospital                       | 4715 (11)                       | 12520 (15)                   |       | 4658 (11)                       | 4465 (10)                    |       |
| Private practices              | 355 (0.80)                      | 489 (0.58)                   |       | 351 (0.80)                      | 255 (0.58)                   |       |
| Unknown                        | 899 (2.0)                       | 945 (1.1)                    |       | 882 (2.0)                       | 947 (2.2)                    |       |
| <b>Year of initiation</b>      |                                 |                              | 0.31  |                                 |                              | 0.21  |
| 2018                           | 1085 (2.4)                      | 3875 (4.6)                   |       | 1067 (2.4)                      | 1193 (2.7)                   |       |
| 2019                           | 4759 (11)                       | 10644 (13)                   |       | 4653 (11)                       | 4397 (10)                    |       |
| 2020                           | 6730 (15)                       | 12016 (14)                   |       | 6642 (15)                       | 7290 (17)                    |       |
| 2021                           | 8978 (20)                       | 14879 (18)                   |       | 8891 (20)                       | 10738 (24)                   |       |
| 2022                           | 10511 (24)                      | 16545 (20)                   |       | 10407 (24)                      | 10308 (23)                   |       |
| 2023                           | 10616 (24)                      | 17594 (21)                   |       | 10541 (24)                      | 7384 (17)                    |       |
| 2024                           | 1838 (4.1)                      | 9261 (11)                    |       | 1826 (4.2)                      | 2766 (6.3)                   |       |

**Table S2** Baseline characteristics for new users of semaglutide and sodium-glucose co-transporter 2 inhibitors in Norway before and after standardized mortality ratio weighting

|                                 | Unweighted cohort               |                              |      | SMR-weighted population            |                                 |       |
|---------------------------------|---------------------------------|------------------------------|------|------------------------------------|---------------------------------|-------|
|                                 | Semaglutide<br><i>n</i> = 16860 | SGLT-2is<br><i>n</i> = 34153 | SMD  | Semaglutide<br><i>n</i> = 16860.00 | SGLT-2is<br><i>n</i> = 16685.28 | SMD   |
| Male sex                        | 9099 (54)                       | 22395 (66)                   | 0.24 | 9099 (54)                          | 9137 (55)                       | 0.02  |
| Age, years                      |                                 |                              | 0.39 |                                    |                                 | 0.05  |
| <50                             | 3992 (24)                       | 4485 (13)                    |      | 3992 (24)                          | 4099 (25)                       |       |
| 50-64                           | 7244 (43)                       | 12708 (37)                   |      | 7244 (43)                          | 6802 (41)                       |       |
| 65-79                           | 4964 (29)                       | 13943 (41)                   |      | 4964 (29)                          | 5000 (30)                       |       |
| 80+                             | 660 (3.9)                       | 3017 (8.8)                   |      | 660 (3.9)                          | 784 (4.7)                       |       |
| <b>Diagnoses</b>                |                                 |                              |      |                                    |                                 |       |
| Cerebrovascular disease         | 838 (5.0)                       | 2365 (6.9)                   | 0.08 | 838 (5.0)                          | 879 (5.3)                       | 0.01  |
| Heart failure                   | 848 (5.0)                       | 4124 (12)                    | 0.25 | 848 (5.0)                          | 883 (5.3)                       | 0.01  |
| Obesity                         | 3711 (22)                       | 2983 (8.7)                   | 0.37 | 3711 (22)                          | 3670 (22)                       | <0.01 |
| Ischemic heart disease          | 2743 (16)                       | 9434 (28)                    | 0.28 | 2743 (17)                          | 2781 (17)                       | 0.01  |
| Neurological complications      | 916 (5.4)                       | 1801 (5.3)                   | 0.01 | 916 (5.4)                          | 989 (5.9)                       | 0.02  |
| Peripheral vascular disease     | 1058 (6.3)                      | 2782 (8.2)                   | 0.07 | 1058 (6.3)                         | 1140 (6.8)                      | 0.02  |
| Markers of alcohol abuse        | 379 (2.3)                       | 646 (1.9)                    | 0.03 | 379 (2.3)                          | 380 (2.3)                       | <0.01 |
| Markers of smoking              | 203 (1.2)                       | 348 (1.0)                    | 0.02 | 203 (1.2)                          | 207 (1.2)                       | <0.01 |
| Renal complications             | 1643 (9.7)                      | 3150 (9.2)                   | 0.02 | 1643 (9.7)                         | 1836 (11)                       | 0.04  |
| Eye complications               | 2698 (16)                       | 5932 (17)                    | 0.04 | 2698 (16)                          | 2785 (17)                       | 0.02  |
| <b>Medications</b>              |                                 |                              |      |                                    |                                 |       |
| Statins                         | 8962 (53)                       | 20893 (61)                   | 0.16 | 8962 (53)                          | 9108 (55)                       | 0.03  |
| Anticoagulants                  | 1712 (10)                       | 4866 (14)                    | 0.13 | 1712 (10)                          | 1717 (10)                       | <0.01 |
| Antiplatelets                   | 4421 (26)                       | 12286 (36)                   | 0.21 | 4421 (26)                          | 4520 (27)                       | 0.02  |
| ACEi/ARB                        | 9075 (54)                       | 19736 (58)                   | 0.08 | 9075 (54)                          | 9134 (55)                       | 0.02  |
| Amiodaron                       | 69 (0.41)                       | 341 (1.0)                    | 0.07 | 69 (0.41)                          | 70 (0.42)                       | <0.01 |
| Phosphodiesterase-5 inhibitors* | -                               | -                            |      | -                                  | -                               |       |
| <b>Year of initiation</b>       |                                 |                              | 0.67 |                                    |                                 | 0.17  |
| 2018                            | 6 (0.04)                        | 2570 (7.5)                   |      | 6 (0.04)                           | 207 (1.2)                       |       |
| 2019                            | 1754 (10)                       | 8386 (25)                    |      | 1754 (10)                          | 1432 (8.6)                      |       |
| 2020                            | 3594 (21)                       | 9062 (27)                    |      | 3594 (21)                          | 3973 (24)                       |       |
| 2021                            | 7919 (47)                       | 10209 (30)                   |      | 7919 (47)                          | 7696 (46)                       |       |
| 2022                            | 3587 (21)                       | 3926 (12)                    |      | 3587 (21)                          | 3378 (20)                       |       |

\* Not available in Norwegian dataset

**Table S3** Rates of non-arteritic anterior ischemic optic neuropathy among semaglutide initiators compared to sodium-glucose co-transporter 2 inhibitors initiators for Denmark and Norway and pooled incidence rate differences (measure of absolute effect size) and hazard ratios (measure of relative effect size) with two-year follow-up (intention-to-treat approach)

|                                 | Incidence rate<br>per 10,000 py (events) |            | Hazard ratio<br>(95% CI) | Pooled IRD<br>per 10,000 py<br>(95% CI) | Pooled hazard<br>ratio (95% CI) |
|---------------------------------|------------------------------------------|------------|--------------------------|-----------------------------------------|---------------------------------|
|                                 | Semaglutide                              | SGLT-2is   |                          |                                         |                                 |
| Crude estimates                 |                                          |            |                          |                                         |                                 |
| Denmark                         | 1.64 (12)                                | 0.47 (6)   | 3.48 (1.31–9.28)         | 1.32 (0.40–2.24)                        | 3.43 (1.63–7.25)                |
| Norway                          | 2.91 (7)                                 | 0.89 (5)   | 3.37 (1.06–10.7)         |                                         |                                 |
| Adjusted estimates <sup>a</sup> |                                          |            |                          |                                         |                                 |
| Denmark                         | 1.64 (12.0)                              | 0.39 (2.8) | 4.19 (1.53–11.5)         | 1.47 (0.57–2.36)                        | 5.36 (2.42–11.8)                |
| Norway                          | 2.91 (7.0)                               | 0.37 (0.9) | 7.98 (2.21–28.8)         |                                         |                                 |

Abbreviations: CI, confidence interval; IRD, incidence rate difference; SGLT-2is, sodium-glucose co-transporter 2 inhibitors; py, person-years

<sup>a</sup> adjusted estimates obtained in an standardized mortality ratio weighted pseudo-population

Supplementary Figure S1 Flowchart of cohort selection for Denmark

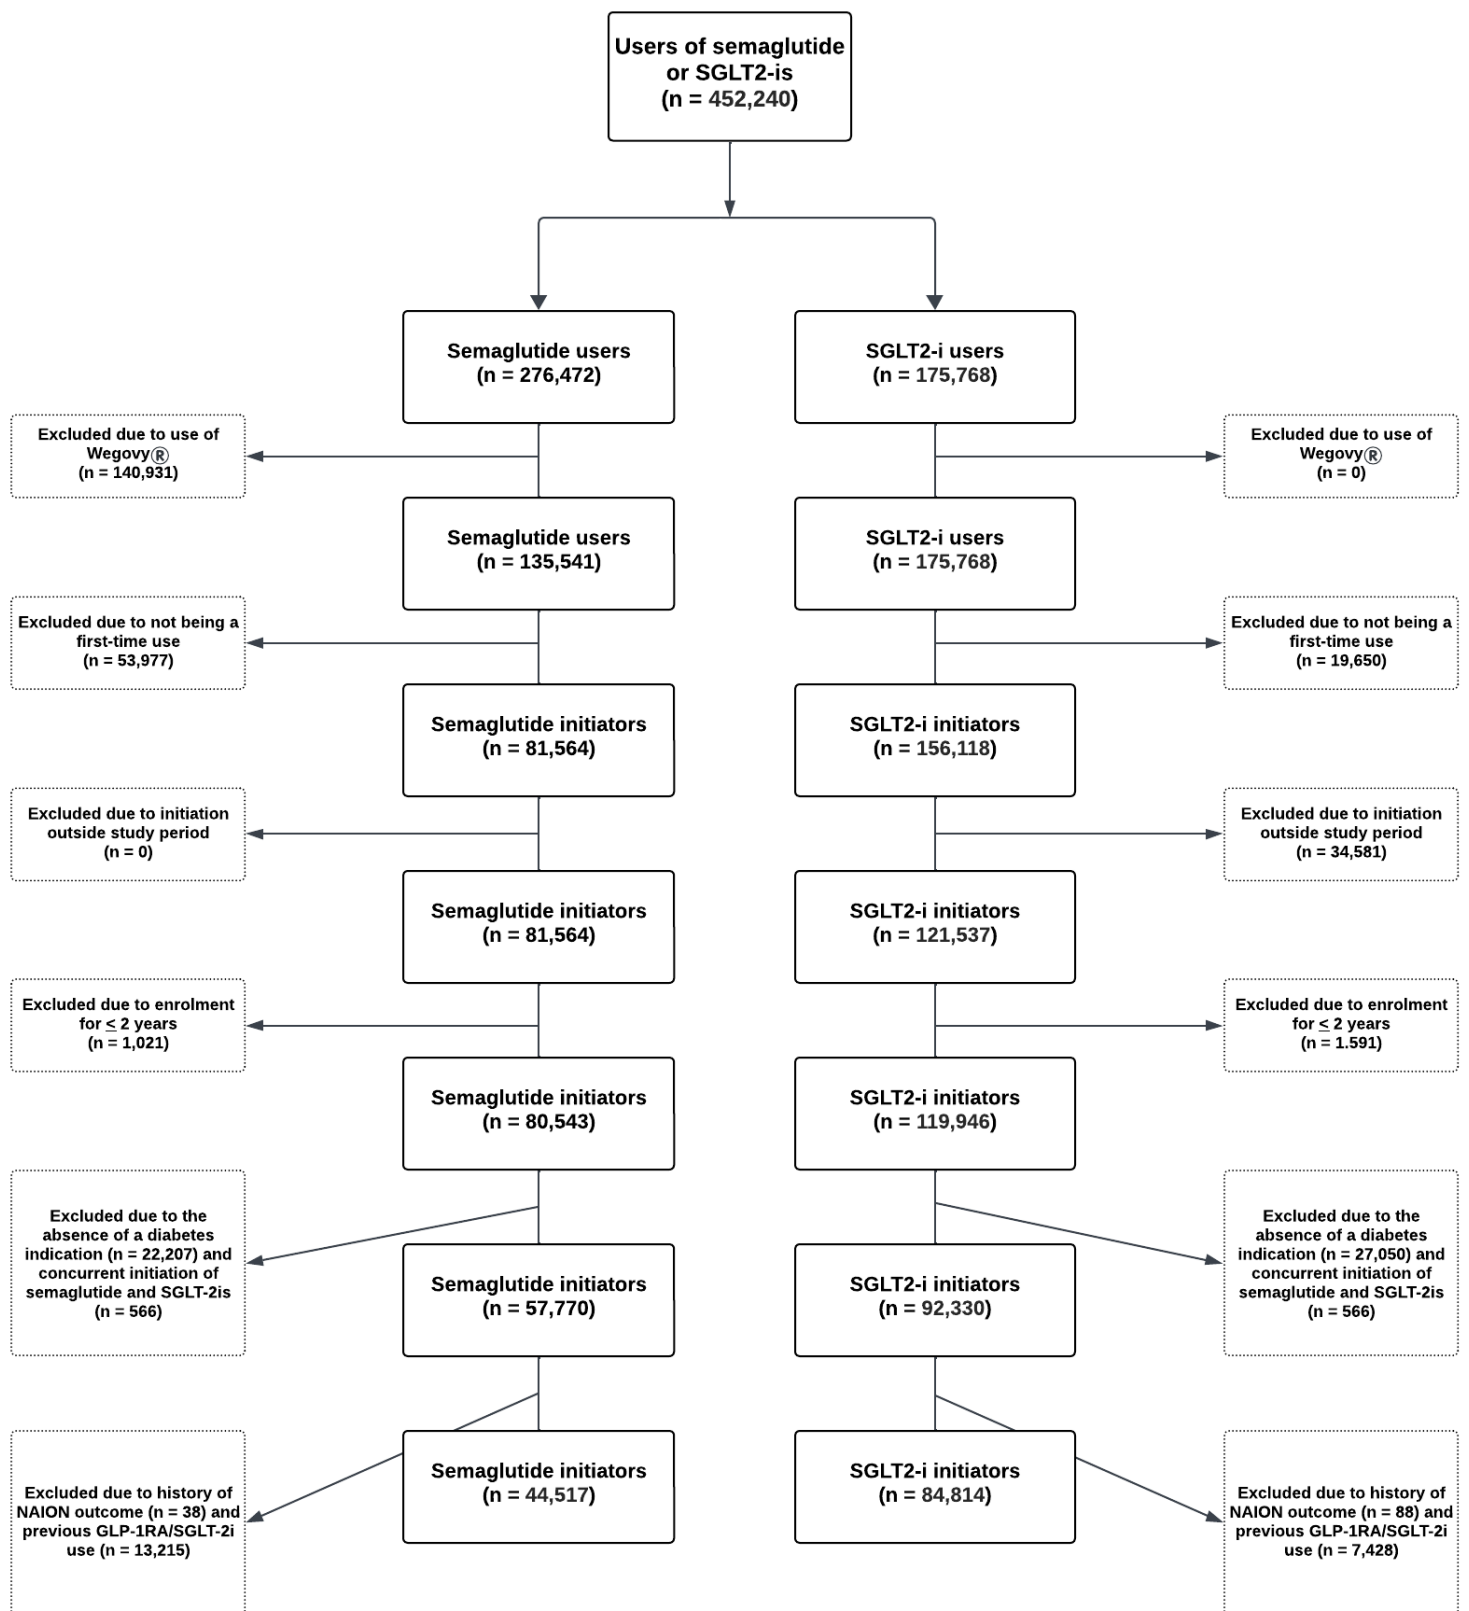

Supplementary Figure S1 Flowchart of cohort selection for Norway

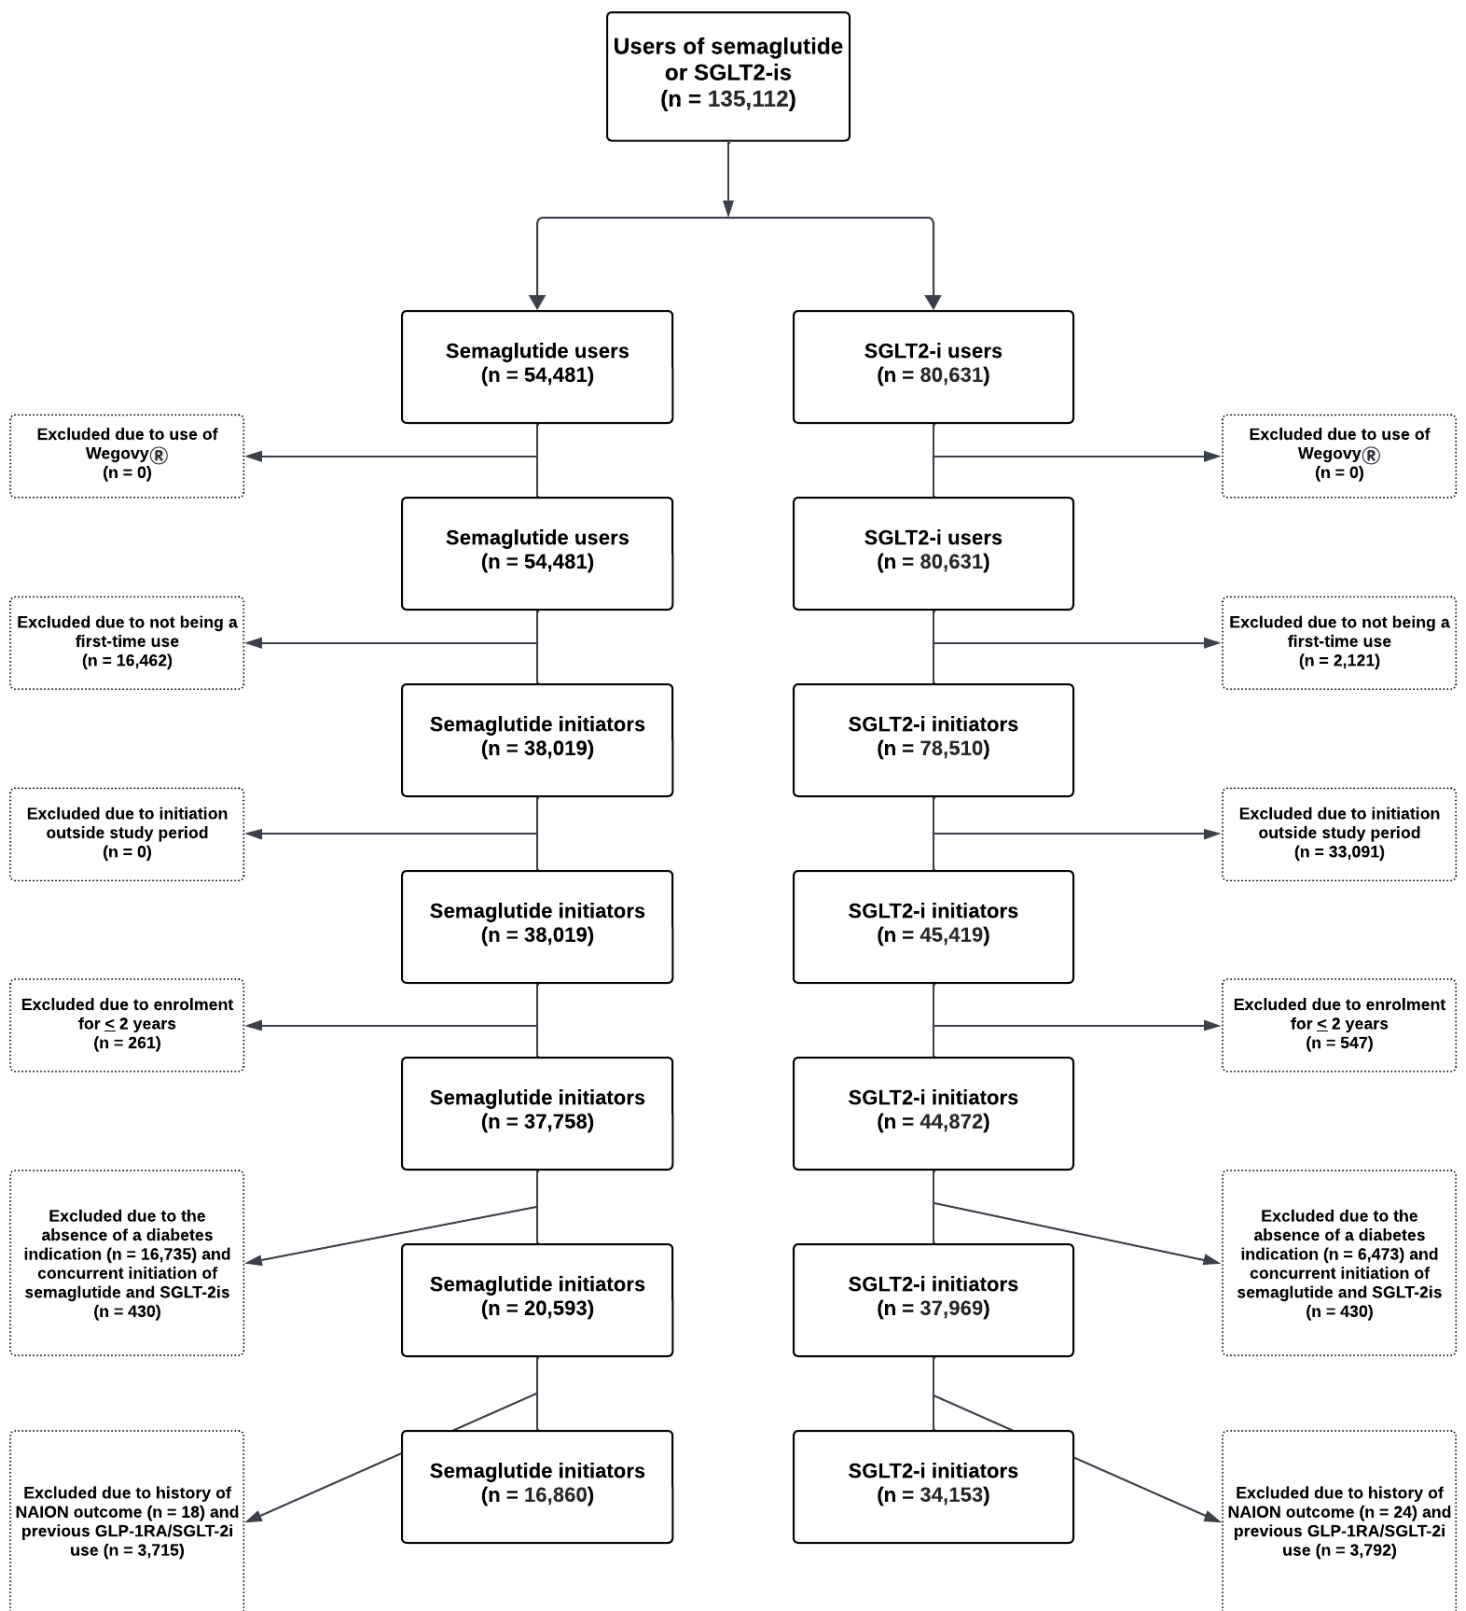

Supplement: Supplementary file [file media-1.pdf]
